# Supplementary material for: Vitamin Supplementation in Pre-Pregnancy and Pregnancy among Women—Effects and Influencing Factors in Romania
Source: MDPI journal article supplement (doi:10.3390/ijerph19148503), 2022-07-12
Supplement: s1 [file s1]

**Table S1.** Basic characteristics about vitamin supplement use before and during pregnancy, Tirgu Mures, Romania, 2015-2016

|                                    |     | Supplement use during pregnancy |     | p<0.001* |
|------------------------------------|-----|---------------------------------|-----|----------|
| Supplement use<br>before pregnancy |     | No                              | Yes |          |
|                                    | No  | 264                             | 63  |          |
|                                    | Yes | 474                             | 246 |          |

\*Chi-square test
